# Supplementary material for: Fish predation on corals promotes the dispersal of coral symbionts
Source: Anim Microbiome. 2021 Mar 22;3:25. doi: 10.1186/s42523-021-00086-4 (PMC7986512; doi:10.1186/s42523-021-00086-4)
Supplement: Supplementary file 2 — Additional file 2: Source data. The tabs “cell counts_metadata” and “Cellcounts” contain densities of live (unstained by trypan blue; column ‘Live’) and dead (stained by trypan blue; column ‘Dead’) Symbiodiniaceae cells ml− 1 material (feces, sediment seawater), as determined through cell counts using a hemocytometer and compound microscope at 20x magnification. Reported cell densities are averages of 8 replicate counts. The code to replicate this analysis can be found on https://github.com/CorreaLab/Fishces_2020/blob/master/Symbiodiniaceae%20cell%20counts%20code. The tabs starting with “ITS2” contain sequencing data after processing in Symportal [29]. Individual ITS-2 profiles have been removed to facilitate analysis of Symbiodiniaceae communities at the genus level. All tabs except the “ITS2 metadata” tab are required for analysis using code deposited on https://github.com/CorreaLab/Fishces_2020/blob/master/Symbiodiniaceae%20community%20analysis%20code. The tab “ITS2 random subsampling” contains the randomly subsampled data used for statistical analysis with PERMANOVA. The tabs “Bootstrap_datafile_metadata” and “Bootstrap_datafile” contain the dataset used to estimate the daily dispersal of Symbiodiniaceae cells by three fish species. The column ‘Live_g_sample’ contains Symbiodiniaceae cell densities g− 1 fecal sample; the column ‘Wet_weight’ contains the weight of fecal pellets cm− 1; the columns ‘MCR_LTER_Site’ – ‘Fish_density’ contain fish abundances at four transects of MCR LTER sites 1 and 2; the column ‘Pellet_length’ contains lengths of fecal pellets as measured during observations in the field. The code to replicate this analysis is available on https://github.com/CorreaLab/Fishces_2020/blob/master/Symbiodiniaceae%20cell%20dispersal%20bootstrap%20code [file 42523_2021_86_MOESM2_ESM.xlsx]

## Sheet: Cell counts_metadata
Variable	Explanation	Variable type	Levels	Year	Source
Sample	Sample name	Categorical
Species	Species abbrevation	Categorical	"AMSC", "CHCI", "CHOR", "CHSP", "CHRE", "CHPE", "CHLU", "CTFL", "CTST", "SED", "WAT"
Zone	Reef zone	Categorical	"Back Reef", "Fore Reef"
Ecology	Diet (Coral use)	Categorical	"Obligate corallivore", "Facultative corallivore", "Grazer/detritivore", "Environmental"
Live	Live cell density per ml sample	Continuous		2019	This study
Dead	Dead cell density per ml sample	Continuous		2019	This study
The code required for the analysis can be found on https://github.com/CorreaLab/Fishces_2020/blob/master/Symbiodiniaceae%20cell%20counts%20code

## Sheet: Cellcounts
Sample	Species	Zone	Ecology	Live	Dead
19AMSC1	AMSC	Fore reef	Obligate corallivore	1464750	472500
19AMSC2	AMSC	Fore reef	Obligate corallivore	1.48774e+06	1.31977e+06
19AMSC3	AMSC	Fore reef	Obligate corallivore	1.00935e+06	658269
19AMSC4	AMSC	Fore reef	Obligate corallivore	139028	959292
19AMSC5	AMSC	Fore reef	Obligate corallivore	653431	139028
19AMSC6	AMSC	Fore reef	Obligate corallivore	147015	80190.3
19AMSC7	AMSC	Fore reef	Obligate corallivore	669329	93394.7
19CHCI1	CHCI	Back reef	Facultative corallivore	327750	726750
19CHCI2	CHCI	Back reef	Facultative corallivore	95983.1	575898
19CHCI3	CHCI	Back reef	Facultative corallivore	742396	609825
19CHCI4	CHCI	Back reef	Facultative corallivore	82000	1168500
19CHCI5	CHCI	Back reef	Facultative corallivore	2554125	9191375
19CHCI6	CHCI	Back reef	Facultative corallivore	93977.3	845795
19CHLU1	CHLU	Fore reef	Obligate corallivore	5.19872e+06	2.54667e+06
19CHLU2	CHLU	Back reef	Obligate corallivore	4388125	2186625
19CHLU3	CHLU	Back reef	Obligate corallivore	3.24791e+06	1.96063e+06
19CHLU4	CHLU	Back reef	Obligate corallivore	4.50329e+06	364673
19CHLU5	CHLU	Back reef	Obligate corallivore	8.23388e+06	1.04049e+06
19CHLU6	CHLU	Back reef	Obligate corallivore	1.07469e+07	3.33139e+06
19CHLU7	CHLU	Back reef	Obligate corallivore	6.25249e+06	1.92056e+06
19CHLU8	CHLU	Back reef	Obligate corallivore	4546500	2215500
19CHOR1	CHOR	Fore reef	Obligate corallivore	555184	793120
19CHOR10	CHOR	Back reef	Obligate corallivore	8.46905e+06	1.06718e+06
19CHOR11	CHOR	Back reef	Obligate corallivore	8.97951e+06	3.35073e+06
19CHOR12	CHOR	Back reef	Obligate corallivore	8.60775e+06	2.8453e+06
19CHOR13	CHOR	Back reef	Obligate corallivore	1.38231e+07	718803
19CHOR14	CHOR	Back reef	Obligate corallivore	8137500	4.98196e+06
19CHOR2	CHOR	Fore reef	Obligate corallivore	1024000	2000000
19CHOR3	CHOR	Fore reef	Obligate corallivore	2964500	1.84899e+06
19CHOR4	CHOR	Fore reef	Obligate corallivore	4882500	1680000
19CHOR5	CHOR	Fore reef	Obligate corallivore	10839500	3.59854e+06
19CHOR6	CHOR	Fore reef	Obligate corallivore	3.35364e+06	778909
19CHOR7	CHOR	Fore reef	Obligate corallivore	1.64388e+06	530283
19CHOR8	CHOR	Fore reef	Obligate corallivore	651143	212000
19CHOR9	CHOR	Back reef	Obligate corallivore	1.65676e+06	3.48406e+06
19CHPE1	CHPE	Fore reef	Facultative corallivore	215553	431106
19CHPE2	CHPE	Fore reef	Facultative corallivore	2192250	1581750
19CHPE3	CHPE	Fore reef	Facultative corallivore	2.25822e+06	1.12447e+06
19CHPE4	CHPE	Fore reef	Facultative corallivore	7.44879e+06	3.04827e+06
19CHPE5	CHPE	Fore reef	Facultative corallivore	1.62096e+06	1.34729e+06
19CHPE6	CHPE	Fore reef	Facultative corallivore	1.78771e+06	1.92523e+06
19CHPE7	CHPE	Fore reef	Facultative corallivore	1.21561e+06	1.68085e+06
19CHPE8	CHPE	Fore reef	Facultative corallivore	12779.4	63897.1
19CHRE1	CHRE	Fore reef	Obligate corallivore	5.15805e+06	2.65427e+06
19CHRE10	CHRE	Back reef	Obligate corallivore	7.36722e+06	465402
19CHRE11	CHRE	Back reef	Obligate corallivore	1.17431e+07	1.50357e+06
19CHRE2	CHRE	Fore reef	Obligate corallivore	3.3212e+06	1.67347e+06
19CHRE3	CHRE	Fore reef	Obligate corallivore	3.40449e+06	1.4606e+06
19CHRE4	CHRE	Fore reef	Obligate corallivore	5.00803e+06	1442000
19CHRE5	CHRE	Fore reef	Obligate corallivore	1.10476e+07	3.46539e+06
19CHRE6	CHRE	Fore reef	Obligate corallivore	1.4897e+07	1.73157e+06
19CHRE7	CHRE	Fore reef	Obligate corallivore	4.86566e+06	1.11119e+06
19CHRE8	CHRE	Fore reef	Obligate corallivore	9.83335e+06	1.3581e+06
19CHRE9	CHRE	Back reef	Obligate corallivore	7.18591e+06	1.42687e+06
19CHSP1	CHSP	Fore reef	Facultative corallivore	0	20113.9
19CHSP2	CHSP	Fore reef	Facultative corallivore	10618.2	159274
19CHSP3	CHSP	Fore reef	Facultative corallivore	44515.6	1.02386e+06
19CHSP4	CHSP	Fore reef	Facultative corallivore	0	2065000
19CHSP5	CHSP	Fore reef	Facultative corallivore	8621.73	422465
19CHSP6	CHSP	Fore reef	Facultative corallivore	0	172421
19CHSP7	CHSP	Fore reef	Facultative corallivore	94500	3543750
19CHSP8	CHSP	Fore reef	Facultative corallivore	10801.7	529284
19CTFL1	CTFL	Fore reef	Grazer/detritivore	0	44153.8
19CTFL2	CTFL	Fore reef	Grazer/detritivore	0	504226
19CTFL3	CTFL	Fore reef	Grazer/detritivore	0	22257.8
19CTFL4	CTFL	Fore reef	Grazer/detritivore	16333.3	98000
19CTFL5	CTFL	Fore reef	Grazer/detritivore	11618.4	58092.1
19CTFL6	CTFL	Fore reef	Grazer/detritivore	0	502957
19CTFL7	CTFL	Fore reef	Grazer/detritivore	0	45888.9
19CTFL8	CTFL	Fore reef	Grazer/detritivore	34382.4	584500
19CTST1	CTST	Back reef	Grazer/detritivore	0	429000
19CTST2	CTST	Back reef	Grazer/detritivore	9336.71	74693.6
19CTST3	CTST	Back reef	Grazer/detritivore	27485.3	1.18187e+06
19CTST4	CTST	Back reef	Grazer/detritivore	0	214795
19CTST5	CTST	Back reef	Grazer/detritivore	0	68764.7
19CTST6	CTST	Back reef	Grazer/detritivore	0	1.30328e+06
FORH2O1	WAT	Fore reef	Environmental	0	0
FORH2O2	WAT	Fore reef	Environmental	0	0
FORH2O3	WAT	Fore reef	Environmental	0	0
FORH2O4	WAT	Fore reef	Environmental	0	0
FORH2O5	WAT	Fore reef	Environmental	0	0
FORH2O6	WAT	Fore reef	Environmental	0	0
FORSED1	SED	Fore reef	Environmental	0	0
FORSED2	SED	Fore reef	Environmental	0	21
FORSED3	SED	Fore reef	Environmental	21	42
FORSED4	SED	Fore reef	Environmental	21	21
FORSED5	SED	Fore reef	Environmental	42	21
FORSED6	SED	Fore reef	Environmental	21	0
BAKH2O1	WAT	Back reef	Environmental	0	2.77381
BAKH2O2	WAT	Back reef	Environmental	0	0
BAKH2O3	WAT	Back reef	Environmental	0	0
BAKH2O4	WAT	Back reef	Environmental	2.77381	5.54761
BAKH2O5	WAT	Back reef	Environmental	0	0
BAKH2O6	WAT	Back reef	Environmental	0	0
BAKSED1	SED	Back reef	Environmental	126	84
BAKSED2	SED	Back reef	Environmental	21	21
BAKSED3	SED	Back reef	Environmental	0	42
BAKSED4	SED	Back reef	Environmental	0	63
BAKSED5	SED	Back reef	Environmental	21	21
BAKSED6	SED	Back reef	Environmental	0	0

## Sheet: ITS2 metadata
Sheet	Data
ITS2 profiles	Raw ITS2 profiles provided by symportal, needs to be attached with sheet "ITS2 profiles clade designation" to get clade-specific relative abundances
ITS2 profiles clade designation	Clade designations for each ITS2 profile provided by Symportal
ITS2 random subsampling	Randomly subsampled dataset used for the statistical analysis
ITS2 sample map	Sample metadata for use in the analysis
ITS2 species code	Species codes and names for use in the analysis
ITS2 Symbiont genera	Symbiodiniaceae genera names for use in the analysis
The code required for the analysis can be found on https://github.com/CorreaLab/Fishces_2020/blob/master/Symbiodiniaceae%20community%20analysis418 %20code

## Sheet: ITS2 profiles
ITS2_type_profile	Sample	105	104	108	117	109	110	107	116	119	113	106	111	112	114	115	118	120	121	122	128	135	130	132	129	124	126	138	174	133	134	127	168	141	131	136	137	139	147	123	153	148	149	150	154	173	140	142	144
858	19AMSC1	0	0	0	0	0	0	0	0	0	0	0	0	0	0	0	0	0	0	0	19303	0	0	0	0	0	0	0	0	0	0	0	0	0	0	0	0	0	0	0	0	0	0	0	0	0	0	0	0
859	19AMSC2	0	0	0	0	0	0	0	0	0	0	0	0	0	0	0	0	0	0	0	0	188	0	0	0	0	0	2280	0	0	0	0	0	0	0	0	0	6670	0	0	0	0	0	0	0	0	0	0	0
860	19AMSC3	0	0	0	0	0	0	0	0	0	0	0	0	0	0	0	0	0	0	0	18577	0	0	0	0	0	0	0	0	0	0	0	0	0	0	0	0	0	0	0	0	0	0	0	0	0	0	0	0
861	19AMSC4	0	772	0	0	0	0	0	0	0	0	0	0	0	0	0	0	0	0	0	12306	0	0	0	0	0	0	0	0	0	0	0	0	0	0	0	0	0	0	0	0	0	0	0	0	0	0	0	0
862	19AMSC5	0	0	0	0	0	0	0	0	0	0	0	0	0	0	0	0	0	0	0	0	0	0	0	0	0	0	306	0	0	0	0	0	0	0	0	0	0	0	0	0	0	0	0	0	0	0	0	0
863	19AMSC6	0	0	0	0	0	0	0	0	0	0	0	0	0	0	0	0	0	0	0	0	0	0	0	0	0	0	0	0	0	0	0	18264	0	0	0	0	0	0	2704	0	0	0	0	0	0	0	0	0
864	19AMSC7	0	0	0	0	0	0	0	0	0	0	0	0	0	0	0	0	0	0	0	3009	0	0	0	0	0	0	0	0	0	0	0	0	0	0	0	0	0	0	0	0	0	0	0	0	0	0	0	0
865	19CHCI1	0	0	0	0	0	0	0	0	0	0	0	0	0	0	0	0	0	0	0	11411	0	0	0	0	0	0	0	0	1818	0	0	0	0	0	0	0	0	0	0	0	0	0	0	0	0	0	0	0
866	19CHCI2	0	0	0	3246	0	0	0	0	0	0	0	0	0	0	0	0	0	0	0	6201	0	0	911	0	0	0	0	0	2060	0	0	0	0	0	0	0	0	0	0	0	0	0	0	0	0	0	0	0
867	19CHCI3	0	0	0	0	0	0	0	0	0	0	0	0	0	0	0	0	0	0	0	0	0	0	0	0	2806	0	0	0	8880	0	0	0	0	0	0	0	0	0	0	0	0	0	0	0	0	0	0	0
868	19CHCI4	0	126	0	16	0	0	0	0	0	0	0	0	0	0	0	0	0	0	0	7807	0	0	0	13173	0	0	0	0	3359	0	0	0	0	0	0	0	0	0	0	0	0	0	0	0	0	0	0	0
869	19CHCI5	0	0	0	0	892	0	0	0	0	0	0	0	0	0	0	0	0	0	0	5680	0	0	2724	0	0	0	0	0	5443	0	0	0	0	0	0	0	0	0	0	0	0	0	0	0	0	0	0	0
870	19CHCI6	0	0	0	2520	0	0	0	0	0	0	0	0	0	0	0	0	0	0	0	6085	0	0	971	0	0	0	0	0	0	0	0	0	0	0	0	0	0	0	0	0	0	0	0	532	0	0	0	0
871	19CHLU1	0	0	0	0	0	0	0	0	0	0	0	0	0	0	0	0	0	0	0	8164	0	0	0	0	0	0	0	0	0	0	0	0	0	0	0	0	0	0	0	0	0	0	0	0	0	0	0	0
872	19CHLU2	0	0	0	0	0	0	0	0	0	0	0	0	0	0	0	0	0	0	0	3925	0	0	453	0	0	0	0	0	0	0	0	0	0	0	0	0	0	0	0	0	0	0	0	0	0	0	0	0
873	19CHLU3	0	0	0	0	0	0	0	0	0	0	0	0	0	0	0	0	0	0	0	0	0	0	0	0	2787	0	0	0	0	0	0	0	0	0	0	0	0	0	0	0	0	0	0	0	0	0	0	0
874	19CHLU4	0	0	0	0	0	0	0	0	0	0	0	0	0	0	0	0	0	0	0	11805	0	0	0	3898	0	0	0	0	0	0	0	0	0	0	0	0	0	0	0	0	0	0	0	0	0	0	0	0
875	19CHLU5	0	0	0	0	0	0	0	0	0	0	0	0	0	0	0	0	0	0	0	8077	0	0	0	0	0	0	0	0	0	0	0	0	0	0	0	0	0	0	0	0	0	0	0	0	0	0	0	0
876	19CHLU6	0	0	0	0	0	0	0	0	0	0	0	0	0	0	0	0	0	0	0	7330	0	0	0	4494	0	0	0	0	0	0	0	0	0	0	0	0	0	0	0	0	0	0	0	0	0	0	0	0
877	19CHLU7	0	0	0	0	0	0	0	0	0	0	0	0	0	0	0	0	0	0	0	0	0	0	0	12468	9402	0	0	0	0	0	0	0	0	0	0	0	0	0	0	0	0	0	0	0	0	0	0	0
878	19CHLU8	0	0	0	0	0	0	0	0	0	0	0	0	0	0	0	0	0	0	0	0	0	0	0	6664	11583	0	0	0	0	0	0	0	0	0	0	0	0	0	0	0	0	0	0	0	0	0	0	0
884	19CHOR1	0	0	0	0	0	0	0	0	0	0	0	0	0	0	0	0	0	0	0	9107	0	0	0	0	0	0	0	0	0	0	0	0	0	0	0	0	0	0	0	0	0	0	0	0	0	0	0	0
879	19CHOR10	300	0	0	0	0	0	0	0	0	0	0	0	0	0	0	0	0	0	0	19469	0	0	0	17223	0	0	0	0	0	0	0	0	0	0	0	0	0	0	0	0	0	0	0	0	0	0	0	0
880	19CHOR11	0	0	0	0	0	0	0	0	0	0	0	0	0	0	0	0	0	0	0	12059	0	0	0	2599	0	0	0	0	0	0	0	0	0	0	0	0	0	0	0	0	0	0	0	0	0	0	0	0
881	19CHOR12	197	0	0	0	0	0	0	0	0	0	0	0	0	0	0	0	0	0	0	14042	0	0	0	0	0	0	0	0	0	0	0	0	0	0	0	0	0	0	0	0	0	0	0	0	0	0	0	0
882	19CHOR13	0	0	0	0	0	0	0	0	0	161	0	0	0	0	0	0	0	0	0	0	0	0	0	13375	5248	0	0	0	0	0	0	0	0	0	0	0	0	0	0	0	0	0	0	0	0	0	0	0
883	19CHOR14	0	0	0	0	0	0	0	0	0	0	0	0	0	0	0	0	0	0	0	26285	0	0	2202	0	0	0	0	0	0	0	0	0	0	0	0	0	0	0	0	0	0	0	0	0	0	0	0	0
885	19CHOR2	0	0	0	0	0	0	0	0	0	0	0	0	0	0	0	0	0	0	0	11875	0	0	0	0	0	0	0	0	0	0	0	0	0	0	0	0	0	0	0	0	0	0	0	0	0	0	0	0
886	19CHOR3	0	0	0	0	0	91	0	0	0	15	0	0	0	0	0	0	0	0	0	26376	0	0	0	0	0	0	0	0	0	0	1306	0	0	0	0	0	0	0	0	0	0	0	0	0	0	0	0	0
887	19CHOR4	0	0	0	0	0	0	0	0	0	0	0	0	0	0	0	0	0	0	0	7172	0	0	0	0	0	0	0	0	0	0	0	0	0	0	0	0	0	0	0	0	0	0	0	0	0	0	0	0
888	19CHOR5	0	0	0	0	0	0	0	0	0	0	0	0	0	0	0	0	0	0	0	22321	0	0	0	0	0	0	0	0	0	0	0	0	0	0	0	0	0	0	0	0	0	0	0	0	0	0	0	0
889	19CHOR6	0	0	0	0	0	0	0	0	0	0	0	0	0	0	0	0	0	0	0	15621	0	0	0	0	0	0	0	0	0	0	0	0	0	0	0	0	0	0	0	0	0	0	0	0	0	0	0	0
890	19CHOR7	0	0	0	0	0	0	0	0	0	0	0	0	0	0	0	0	0	0	0	17783	0	0	0	0	0	0	0	0	0	0	0	0	0	0	0	0	0	0	0	0	0	0	0	0	0	0	0	0
891	19CHOR8	0	0	0	0	0	0	0	0	0	0	0	0	0	0	0	0	0	0	0	18860	0	0	0	0	0	0	0	0	0	0	0	0	0	0	0	0	0	0	0	0	0	0	0	0	0	0	0	0
892	19CHOR9	21	0	0	0	0	0	0	0	0	0	0	0	0	0	0	0	0	0	0	25172	0	0	0	7958	0	0	0	0	0	0	0	0	0	0	0	0	0	0	0	0	0	0	0	0	0	0	0	0
893	19CHPE1	0	0	0	0	0	0	0	0	0	0	0	0	0	0	0	0	0	0	0	7018	0	0	0	0	0	0	0	0	0	0	0	0	0	0	0	0	0	0	0	0	0	0	0	0	0	0	0	0
894	19CHPE2	0	0	0	0	0	0	0	0	0	0	0	0	0	0	0	0	0	0	0	7016	0	0	0	0	0	0	0	0	0	0	6098	0	0	0	0	0	0	0	0	0	0	0	0	0	0	0	0	0
895	19CHPE3	0	0	0	0	0	0	0	0	0	0	0	0	0	0	0	0	0	0	0	36665	0	0	0	0	0	0	0	0	0	0	0	0	0	0	0	0	0	0	0	0	0	0	0	0	0	0	0	0
896	19CHPE4	0	0	0	0	0	0	0	0	0	0	0	0	0	0	0	0	0	0	0	16815	0	0	0	0	0	0	0	0	0	0	0	0	0	0	0	0	0	0	0	0	0	0	0	0	0	0	0	0
897	19CHPE5	0	0	0	0	0	0	0	0	0	0	0	0	0	0	0	0	0	0	0	3028	0	0	0	0	0	0	0	0	0	0	7251	0	0	0	0	0	0	0	0	0	0	0	0	0	0	0	0	0
898	19CHPE6	0	0	0	0	430	0	0	0	0	0	0	0	0	0	0	0	0	0	0	11971	0	0	0	0	0	0	0	0	0	0	0	0	0	0	0	0	0	0	0	0	0	0	0	0	0	0	0	0
899	19CHPE7	0	0	0	0	0	0	0	0	0	0	0	0	0	0	0	0	0	0	0	22781	0	0	0	0	0	0	0	0	0	0	0	0	0	0	0	0	0	0	0	0	0	0	0	0	0	0	0	0
900	19CHPE8	0	0	0	0	0	0	0	0	0	0	0	0	0	0	0	0	0	0	0	18113	0	0	0	0	0	0	0	0	0	0	0	0	0	0	0	0	0	0	0	0	0	0	0	0	0	0	0	0
903	19CHRE1	0	0	0	0	0	0	0	0	0	0	0	0	0	0	0	0	0	0	0	14663	0	0	0	0	0	0	0	0	0	0	0	0	0	0	0	0	0	0	0	0	0	0	0	0	0	0	0	0
901	19CHRE10	0	0	0	0	0	0	0	0	0	0	0	0	0	0	0	0	0	0	0	4048	0	0	0	0	0	0	0	0	0	0	0	0	0	0	0	0	0	0	0	0	0	0	0	0	0	0	0	0
902	19CHRE11	0	0	0	0	0	234	0	0	0	0	0	0	0	0	0	0	0	0	0	21537	0	0	3425	0	0	0	0	0	0	0	0	0	0	0	0	0	0	0	0	0	0	0	0	0	0	0	0	0
904	19CHRE2	0	0	0	0	0	0	0	0	0	0	0	0	0	0	0	0	0	0	0	13594	0	0	0	0	0	0	0	0	0	0	0	0	0	0	0	0	0	0	0	0	0	0	0	0	0	0	0	0
905	19CHRE3	289	0	0	0	0	0	0	0	0	0	0	0	0	0	0	0	0	0	0	15294	0	0	0	0	0	0	0	0	0	0	0	0	0	0	0	0	0	0	0	0	0	0	0	0	0	0	0	0
906	19CHRE4	0	0	0	0	0	0	0	0	0	0	0	0	0	0	0	0	0	0	0	29392	0	0	0	0	0	0	0	0	0	0	0	0	0	0	0	0	0	0	0	0	0	0	0	0	0	0	0	0
907	19CHRE5	0	0	0	0	0	0	0	0	0	0	0	0	0	0	0	0	0	0	0	15884	0	0	0	0	0	0	0	0	0	0	0	0	0	0	0	0	0	0	0	0	0	0	0	0	0	0	0	0
908	19CHRE6	0	0	0	0	0	0	0	0	0	0	0	0	0	0	0	0	0	0	0	30222	0	0	0	0	0	0	0	0	0	0	0	0	0	0	0	0	0	0	0	0	0	0	0	0	0	0	0	0
909	19CHRE7	0	0	0	0	0	0	0	0	0	0	0	0	0	0	0	0	0	0	0	15058	0	0	0	0	0	0	0	0	0	0	0	0	0	0	0	0	0	0	0	0	0	0	0	0	0	0	0	0
910	19CHRE8	0	0	0	0	0	0	0	0	0	0	0	0	0	0	0	0	0	0	0	21073	0	0	0	0	0	0	0	0	0	0	0	0	0	0	0	0	0	0	0	0	0	0	0	0	0	0	0	0
911	19CHRE9	0	0	0	0	0	0	0	0	0	0	0	0	0	0	0	0	0	0	0	17781	0	0	1770	0	0	0	0	0	0	0	0	0	0	0	0	0	0	0	0	0	0	0	0	0	0	0	0	0
912	19CHSP1	0	0	0	0	0	184	0	0	0	0	0	0	0	0	0	0	0	0	0	6718	438	0	0	0	0	0	0	0	0	0	2382	0	0	0	0	0	0	0	0	0	0	0	0	0	0	0	0	0
913	19CHSP2	0	0	0	0	0	138	0	0	0	0	0	0	0	0	0	0	0	0	0	1135	104	0	0	0	0	0	0	0	0	0	386	0	0	0	0	0	0	0	0	0	0	0	0	0	0	0	0	0
914	19CHSP3	0	0	0	0	0	0	0	0	0	0	0	0	0	0	0	0	0	0	0	15078	0	0	0	0	0	0	0	0	0	0	0	0	0	0	0	0	0	0	0	0	0	0	0	0	0	0	0	0
915	19CHSP4	0	0	0	0	0	0	0	0	0	0	0	0	0	0	0	0	0	0	0	4193	0	0	0	356	0	0	0	0	0	0	0	0	0	0	0	0	0	0	0	0	0	0	0	0	0	0	0	0
916	19CHSP5	0	0	0	0	1930	0	0	0	0	0	0	0	0	0	0	0	0	0	0	0	0	0	0	0	0	0	0	0	0	0	0	0	0	0	0	0	0	0	0	0	0	0	0	0	0	0	0	0
917	19CHSP6	0	0	0	0	0	0	0	0	0	0	0	0	0	0	0	0	0	0	0	0	0	0	64	0	201	0	0	0	0	0	0	0	122	0	0	0	0	0	0	0	0	0	0	0	0	0	0	0
918	19CHSP7	0	0	0	0	0	0	0	0	0	0	0	0	0	0	0	0	0	0	0	0	0	0	0	6928	0	0	963	0	0	0	0	0	0	0	0	0	3772	0	0	0	0	0	0	0	0	0	0	0
919	19CHSP8	0	0	0	0	0	0	0	0	0	0	0	0	0	0	0	0	0	0	0	0	0	0	0	0	392	0	0	0	0	0	0	0	0	0	0	0	0	0	0	0	0	0	0	0	0	0	0	0
921	19CTFL1	0	36	294	149	0	0	0	0	0	0	0	0	0	0	0	0	0	0	0	4280	0	0	0	0	0	0	0	0	0	0	0	0	0	0	0	0	0	0	0	0	0	0	0	0	0	0	0	0
922	19CTFL2	0	0	0	0	0	0	0	0	0	0	0	0	0	0	0	0	0	0	0	0	0	0	0	0	0	0	0	0	0	0	0	0	0	0	0	0	0	0	0	0	0	0	0	0	0	0	0	0
923	19CTFL3	0	0	1186	0	0	0	0	0	0	0	0	0	0	0	0	0	0	0	0	0	0	0	0	0	1489	0	0	595	0	0	0	0	226	0	0	0	0	0	0	0	0	0	0	0	0	0	222	0
924	19CTFL4	0	0	0	0	0	232	0	0	0	0	0	0	0	0	0	0	0	0	0	0	0	0	0	0	0	252	0	0	0	0	0	0	0	0	0	0	0	0	0	56	0	0	0	0	0	0	0	0
925	19CTFL5	0	0	0	0	0	144	0	0	0	0	0	0	0	0	0	0	0	0	0	0	0	0	0	0	284	0	0	37	0	0	0	0	133	0	0	0	0	0	0	0	0	0	0	0	0	0	0	0
926	19CTFL6	0	0	0	63	0	0	0	35	38	0	0	0	0	83	0	0	0	0	0	0	0	0	0	0	0	152	0	55	0	0	0	0	88	0	0	0	0	0	0	0	0	0	0	0	0	0	0	0
927	19CTFL7	0	0	0	111	0	0	0	0	0	0	0	0	0	0	0	0	0	0	0	0	0	0	0	0	0	183	0	0	77	0	0	0	0	0	0	0	0	0	0	0	0	0	0	0	0	0	0	0
928	19CTFL8	0	0	0	0	0	0	1310	0	0	0	0	0	0	0	0	0	0	0	0	0	0	0	0	0	0	0	0	0	0	0	0	0	0	0	592	0	0	187	0	0	0	0	0	0	0	0	0	0
929	19CTST1	0	116	799	0	0	0	0	0	0	0	0	0	0	0	0	0	0	0	0	0	32	0	0	0	0	0	0	0	0	0	0	0	0	0	842	0	0	0	0	0	0	0	0	0	0	0	0	0
930	19CTST2	0	104	0	0	0	0	942	0	0	0	0	0	0	0	0	0	0	0	0	0	0	0	0	0	0	0	0	0	0	0	0	0	0	0	800	0	0	0	0	0	0	0	0	0	0	0	0	0
931	19CTST3	0	0	0	0	0	0	1149	0	0	0	0	0	0	0	0	0	0	0	0	0	0	0	0	0	679	0	0	0	0	0	0	0	284	0	0	0	0	0	0	142	0	0	0	0	0	0	0	0
932	19CTST4	0	0	0	0	0	0	2331	0	0	0	0	0	0	0	0	0	0	0	0	0	0	0	0	0	0	0	0	0	0	0	0	0	0	0	1940	0	0	0	0	0	0	0	0	0	0	0	0	0
933	19CTST5	0	0	2844	0	557	0	0	0	0	0	0	0	0	0	0	0	0	0	0	0	0	0	0	0	0	0	0	0	0	0	0	0	0	0	2129	0	0	256	0	0	0	0	0	0	0	0	0	0
934	19CTST6	91	0	2715	0	0	0	0	0	0	0	0	0	0	0	0	0	0	0	0	0	0	0	0	0	0	0	0	0	0	0	0	0	0	0	1206	0	0	182	0	0	0	0	0	0	0	0	0	0
935	BAKH2O1	0	0	0	0	0	0	0	0	0	0	0	0	0	0	0	0	0	0	0	0	0	0	0	0	0	0	0	0	0	0	0	0	0	0	0	0	0	0	0	0	0	0	0	0	0	0	0	0
936	BAKH2O2	0	4879	0	0	0	0	0	0	0	0	0	0	0	0	0	0	0	0	0	0	0	0	0	0	0	0	0	0	0	0	0	0	0	0	0	0	0	0	0	0	0	0	0	0	0	0	0	0
937	BAKH2O3	0	112	0	0	0	0	0	0	0	0	0	0	0	0	0	399	0	0	0	0	0	0	0	0	0	0	0	473	0	0	0	0	0	0	0	0	0	0	0	0	0	0	0	0	0	0	0	0
938	BAKH2O4	0	838	0	0	0	0	0	0	0	0	0	0	0	0	0	0	0	0	0	0	343	0	1085	0	0	1047	0	0	0	0	0	0	0	0	0	0	0	0	0	0	0	0	0	0	0	0	0	0
939	BAKH2O5	0	0	0	0	0	0	0	0	0	0	0	0	0	0	0	0	0	0	0	0	0	0	263	0	0	0	2321	0	0	0	0	0	0	0	0	0	0	0	0	0	0	0	0	0	0	0	0	371
940	BAKH2O6	0	0	0	0	0	0	0	0	0	0	0	0	0	0	0	0	0	0	0	0	0	0	101	0	0	17	0	0	0	0	0	0	0	0	0	0	0	0	0	0	79	0	0	0	0	0	0	0
941	BAKSED1	0	43	0	0	0	0	0	0	0	0	0	174	0	0	0	0	0	0	0	0	0	0	1931	0	788	0	0	0	0	0	0	0	258	0	0	0	0	0	0	0	0	0	0	0	0	0	0	0
942	BAKSED2	1116	0	0	0	0	0	0	0	0	0	0	0	0	0	0	0	0	0	0	0	0	0	772	0	0	0	2382	760	0	0	0	0	0	0	0	0	0	0	0	0	0	0	0	0	0	0	0	0
943	BAKSED3	411	0	849	0	0	0	0	0	0	0	0	0	0	0	0	0	0	0	0	0	0	0	1411	0	0	328	0	0	0	0	0	0	0	0	0	0	0	0	0	0	0	0	0	0	0	0	0	0
944	BAKSED4	0	0	0	0	183	0	0	0	0	0	0	0	0	0	0	0	0	0	0	0	0	0	349	0	1616	0	0	279	0	0	0	0	0	0	0	0	0	0	0	0	0	0	0	0	0	0	0	0
945	BAKSED5	0	383	0	0	0	0	0	0	0	0	0	0	0	0	0	0	0	0	0	0	0	0	801	0	0	0	0	0	0	0	0	0	0	0	0	0	0	0	0	0	0	0	0	0	0	0	0	0
946	BAKSED6	0	0	0	0	0	0	0	0	0	0	0	0	0	0	420	0	0	0	0	0	0	0	0	0	0	0	0	0	0	0	0	0	328	0	0	0	0	0	0	802	294	597	0	0	0	0	0	0
947	CT102	0	0	0	0	0	0	0	0	0	0	0	0	0	0	0	0	0	0	0	0	0	0	0	0	0	0	0	0	0	0	0	0	0	0	0	0	0	0	0	0	0	0	0	0	0	0	0	0
948	CT108	17382	0	0	0	0	0	0	0	0	0	0	0	0	0	0	0	0	0	0	0	0	0	0	0	0	0	0	0	0	0	0	0	0	0	0	0	0	0	0	0	0	0	0	0	0	0	0	0
949	CT111	0	0	0	0	0	0	0	0	0	0	0	0	0	0	0	0	0	0	0	0	616	9996	0	0	0	0	0	0	0	0	0	0	0	0	0	0	0	0	0	0	0	0	0	0	0	0	0	0
950	CT114	0	0	0	0	0	0	0	0	0	0	0	0	0	0	0	0	0	0	0	0	0	0	0	0	0	0	0	0	0	0	0	11067	0	0	0	0	0	0	0	0	0	0	0	0	0	0	0	0
951	CT117	16245	0	0	0	0	0	0	0	0	0	0	0	0	0	0	0	0	0	0	0	0	0	0	0	0	0	0	0	0	0	0	0	0	0	0	0	0	0	0	0	0	0	0	0	0	0	0	0
952	CT136	0	0	0	0	0	0	0	0	0	0	0	0	0	0	0	0	0	0	0	0	0	0	0	10093	0	0	0	0	0	0	0	0	0	0	0	0	0	0	0	0	0	0	0	0	0	0	0	0
953	CT139	0	0	0	0	0	0	0	0	0	0	0	0	0	0	0	0	0	0	0	0	0	0	0	12875	0	0	0	0	0	0	0	0	0	0	0	0	0	0	0	0	0	0	0	0	0	0	0	0
954	CT145	0	0	0	0	0	0	0	0	0	0	0	0	0	0	0	0	0	0	0	0	0	0	0	0	0	0	0	0	0	0	0	0	0	0	0	0	0	0	0	0	0	0	0	0	0	0	0	0
955	CT146	0	0	0	0	0	0	0	0	0	0	0	0	0	0	0	0	0	0	0	0	0	0	0	22208	0	0	0	0	0	0	0	0	0	0	0	0	0	0	0	0	0	0	0	0	0	0	0	0
956	CT149	0	0	0	0	0	0	0	0	0	0	0	0	0	0	0	0	0	0	0	0	884	15883	0	0	0	0	0	0	0	0	0	0	0	0	0	0	0	0	0	0	0	0	0	0	0	0	0	0
957	CT153-1	0	0	0	0	0	0	0	0	0	0	0	0	0	0	0	0	0	0	0	0	0	0	0	0	0	0	0	0	0	0	0	42861	0	0	0	0	0	0	0	0	0	0	0	0	0	0	0	0
958	CT153-2	0	0	0	0	0	0	0	0	0	0	0	0	0	0	0	0	0	0	0	0	0	0	0	0	0	0	0	0	0	0	0	42069	0	0	0	0	0	0	0	0	0	0	0	0	0	0	0	0
959	CT155	0	0	0	0	0	0	0	0	0	0	0	0	0	0	0	0	0	0	0	0	0	0	0	42499	0	0	0	0	0	0	0	0	0	0	0	0	0	0	0	0	0	0	0	0	0	0	0	0
960	CT159	0	0	0	0	0	0	0	0	0	0	0	0	0	0	0	0	0	0	0	0	0	0	0	0	0	0	0	0	0	0	0	0	0	0	0	0	0	0	0	0	0	0	0	0	0	0	0	0
961	Ct17	0	0	0	0	0	0	0	0	0	0	0	0	0	0	0	0	0	0	0	0	0	0	0	0	0	0	0	0	0	0	0	14918	0	0	0	0	0	0	0	0	0	0	0	0	0	0	0	0
962	CT21	0	0	0	0	0	0	0	0	0	0	0	0	0	0	0	0	0	0	0	0	0	0	0	0	0	0	0	0	0	0	0	0	0	0	0	8885	0	0	0	0	0	0	0	0	0	0	0	0
963	CT22	0	0	0	0	0	0	0	0	0	0	0	0	0	0	0	0	0	0	0	0	0	0	0	28579	0	0	0	0	0	0	0	0	0	0	0	0	0	0	0	0	0	0	0	0	0	0	0	0
964	CT25	0	0	0	0	0	0	0	0	0	0	0	0	0	0	0	0	0	0	0	0	0	0	0	38327	0	0	0	0	0	0	0	0	0	0	0	0	0	0	0	0	0	0	0	0	0	0	0	0
965	CT26	0	0	0	0	0	0	0	0	0	0	0	0	0	0	0	0	0	0	0	0	0	0	0	0	0	0	0	0	0	0	0	0	0	0	0	0	0	0	0	0	0	0	0	0	0	0	0	0
966	CT27	0	0	0	0	0	0	0	0	0	0	0	0	0	0	0	0	0	0	0	0	0	0	0	0	0	0	0	0	0	0	0	0	0	0	0	1662	0	0	0	0	0	0	0	0	0	0	0	0
968	CT3	0	0	0	0	0	0	0	0	0	0	0	0	0	0	0	0	0	0	0	0	0	0	0	0	0	0	0	0	0	0	18188	0	0	0	0	0	0	0	0	0	0	0	0	0	0	0	0	0
967	CT33	0	0	0	0	0	0	0	0	0	0	0	0	0	0	0	0	0	0	0	0	0	0	0	0	0	0	0	0	0	0	0	4550	0	0	0	0	0	0	0	0	0	0	0	0	0	0	0	0
970	CT4	0	0	0	0	0	0	0	0	0	0	0	0	0	0	0	0	0	0	0	0	0	0	0	15830	0	0	0	0	0	0	0	0	0	0	0	0	0	0	0	0	0	0	0	0	0	0	0	0
969	CT49	0	0	0	0	0	0	0	0	0	0	0	0	0	0	0	0	0	0	0	0	1293	23924	0	0	0	0	0	0	0	0	0	0	0	0	0	0	0	0	0	0	0	0	0	0	0	0	0	0
971	CT53	29032	0	0	0	0	0	0	0	0	0	0	0	0	0	0	0	0	0	0	0	0	0	0	0	0	0	0	0	0	0	0	0	0	0	0	0	0	0	0	0	0	0	0	0	0	0	0	0
972	CT60	0	0	0	0	0	0	0	0	0	0	0	0	0	0	0	0	0	0	0	0	551	6724	0	0	0	0	0	0	0	0	0	0	0	0	0	0	0	0	0	0	0	0	0	0	0	0	0	0
973	CT64	14838	0	0	0	0	0	0	0	0	0	0	0	0	0	0	0	0	0	0	0	0	0	0	0	0	0	0	0	0	0	0	0	0	0	0	0	0	0	0	0	0	0	0	0	0	0	0	0
974	CT65	0	0	0	0	0	0	0	0	0	0	0	0	0	0	0	0	0	0	0	0	0	0	0	0	0	0	0	0	0	0	0	72884	0	0	0	0	0	0	0	0	0	0	0	0	0	0	0	0
975	CT67	0	0	0	0	0	0	0	0	0	0	0	0	0	0	0	0	0	0	0	0	697	10911	0	0	0	0	0	0	0	0	0	0	0	0	0	0	0	0	0	0	0	0	0	0	0	0	0	0
976	CT68	0	0	0	0	0	0	0	0	0	0	0	0	0	0	0	0	0	0	0	0	0	0	0	18083	0	0	0	0	0	0	0	0	0	0	0	0	0	0	0	0	0	0	0	0	0	0	0	0
977	CT72	0	0	0	0	0	0	0	0	0	0	0	0	0	0	0	0	0	0	0	0	0	0	0	30840	0	0	0	0	0	0	0	0	0	0	0	0	0	0	0	0	0	0	0	0	0	0	0	0
978	CT73	11935	0	0	0	0	0	0	0	0	0	0	0	0	0	0	0	0	0	0	0	0	0	0	0	0	0	0	0	0	0	0	0	0	0	0	0	0	0	0	0	0	0	0	0	0	0	0	0
979	CT84	0	0	0	0	0	0	0	0	0	0	0	0	0	0	0	0	0	0	0	0	0	0	0	0	0	0	0	0	0	0	0	11600	0	0	0	0	0	0	1220	0	0	0	0	0	0	0	0	0
980	CT87	0	0	0	0	0	0	0	0	0	0	0	0	0	0	0	0	0	0	0	0	0	0	0	48419	0	0	0	0	0	0	0	0	0	0	0	0	0	0	0	0	0	0	0	0	0	0	0	0
981	CT94	11686	0	0	0	0	0	0	0	0	0	0	0	0	0	0	0	0	0	0	0	0	0	0	0	0	0	0	0	0	0	0	0	0	0	0	0	0	0	0	0	0	0	0	0	0	0	0	0
982	CT95	0	0	0	0	0	0	0	0	0	0	0	0	0	0	0	0	0	0	0	0	0	0	20649	0	0	0	0	0	0	0	0	0	0	0	0	0	0	0	0	0	0	0	0	0	0	0	0	0
989	FORH2O1	0	0	0	0	0	0	0	0	0	0	0	0	0	0	0	0	0	0	790	0	0	0	1130	0	0	2976	0	0	0	0	0	0	0	0	0	0	0	0	0	0	0	0	0	0	0	0	0	0
990	FORH2O2	0	0	0	0	0	0	0	0	0	0	0	0	0	0	0	0	0	0	0	0	0	0	0	0	324	0	0	0	0	0	0	0	0	0	0	0	0	0	0	0	0	0	431	0	0	0	0	0
991	FORH2O3	0	0	0	0	0	0	0	0	0	0	1518	0	0	0	0	0	0	0	0	0	0	0	0	0	0	8475	0	3872	0	0	0	0	0	0	0	0	0	0	0	0	0	0	0	0	0	0	0	0
992	FORH2O4	0	0	0	0	0	0	0	0	0	0	0	0	0	0	0	0	0	0	0	0	0	0	0	0	711	0	0	114	0	0	0	0	0	0	0	0	0	0	0	0	0	0	0	0	0	0	0	0
993	FORH2O5	0	0	0	0	0	0	0	0	0	0	0	0	394	0	0	0	0	0	0	0	0	0	0	0	0	0	3262	0	0	0	337	0	0	0	0	0	0	0	0	0	0	0	0	0	0	0	0	0
994	FORH2O6	0	0	0	0	0	0	0	0	0	0	0	0	0	0	0	0	0	0	0	0	0	0	0	0	0	0	0	0	0	0	0	0	0	0	0	0	0	0	0	0	0	0	0	0	0	0	0	0
995	FORSED1	1044	0	0	0	0	0	0	0	0	0	0	0	0	0	0	0	0	0	1552	0	0	0	1095	0	0	0	0	0	1059	0	0	0	0	0	0	0	0	0	0	0	0	2132	0	0	0	0	0	0
996	FORSED2	0	0	0	0	0	0	0	76	0	0	0	0	0	0	0	0	0	0	0	0	0	0	2277	0	683	0	0	0	0	0	0	0	0	0	0	0	0	0	0	0	0	0	0	0	0	0	0	0
997	FORSED3	0	0	0	0	0	0	0	0	528	0	0	0	0	0	0	0	0	0	0	0	0	0	0	0	0	1821	0	0	0	0	0	0	0	0	0	0	0	785	0	0	0	0	0	0	0	0	0	0
998	FORSED4	0	0	0	0	0	0	0	0	0	0	0	0	0	0	0	0	316	0	0	0	0	0	514	0	0	0	2554	0	0	0	0	0	0	0	0	0	0	0	0	0	0	0	0	0	0	0	0	0
999	FORSED5	0	0	0	0	0	0	0	0	0	0	0	0	0	0	0	0	0	0	0	0	0	0	0	0	0	1014	0	0	713	0	1374	0	0	0	0	0	0	0	0	0	0	0	0	865	0	2086	0	0
1000	FORSED6	0	0	0	0	0	0	0	581	176	0	0	0	0	0	0	0	0	0	0	0	0	0	231	0	0	0	741	169	170	0	0	0	0	0	0	0	0	0	0	0	0	0	0	0	0	0	0	0
[truncated: 21 more columns]

## Sheet: ITS2 profiles clade designation
ID	UID	Clade
105	X105	A
104	X104	A
108	X108	A
117	X117	A
109	X109	A
110	X110	A
107	X107	A
116	X116	A
119	X119	A
113	X113	A
106	X106	A
111	X111	A
112	X112	A
114	X114	A
115	X115	A
118	X118	A
120	X120	A
121	X121	A
122	X122	B
128	X128	C
135	X135	C
130	X130	C
132	X132	C
129	X129	C
124	X124	C
126	X126	C
138	X138	C
174	X174	C
133	X133	C
134	X134	C
127	X127	C
168	X168	C
141	X141	C
131	X131	C
136	X136	C
137	X137	C
139	X139	C
147	X147	C
123	X123	C
153	X153	C
148	X148	C
149	X149	C
150	X150	C
154	X154	C
173	X173	C
140	X140	C
142	X142	C
144	X144	C
145	X145	C
146	X146	C
151	X151	C
152	X152	C
169	X169	D
171	X171	D
159	X159	D
156	X156	D
170	X170	D
155	X155	D
161	X161	D
160	X160	D
172	X172	D
158	X158	D
157	X157	D
162	X162	F
163	X163	F
166	X166	F
164	X164	F
165	X165	F
167	X167	H
Other	Other	mixed

## Sheet: ITS2 random subsampling
Species	Type	Sample_ID	A	B	C	D	F	H
Acropora	Acropora	CT102	0	0	0	0.0909091	0	0
Acropora	Acropora	CT108	0.0542906	0	0	0.00206995	0	0
Acropora	Acropora	CT117	0.0543151	0	0	0.00202981	0	0
Acropora	Acropora	CT159	0	0	0	0.0909091	0	0
Acropora	Acropora	CT21	0	0	0.0222312	0.0242154	0	0
Acropora	Acropora	CT26	0	0	0	0.0909091	0	0
Acropora	Acropora	CT27	0	0	0.0029973	0.0819172	0	0
Acropora	Acropora	CT53	0.0527881	0	0	0.00452849	0	0
Acropora	Acropora	CT64	0.0543791	0	0	0.00192505	0	0
Acropora	Acropora	CT73	0.0546129	0	0	0.00154248	0	0
Acropora	Acropora	CT94	0.0555556	0	0	0	0	0
CTFL	Algivore	19CTFL4	0.000523343	0	0.000378972	0.0889158	0	0
CTFL	Algivore	19CTFL8	0.00353548	0	0.00114676	0.0816835	0	0
CTFL	Algivore	19CTFL6	0.000652403	0	0.00047935	0.0884035	0	0
CTFL	Algivore	19CTFL5	0.000444222	0	0.000763928	0.0872846	0.00133267	0
CTFL	Algivore	19CTFL3	0.00332503	0	0.00387199	0.0722832	0.00345176	0
CTFL	Algivore	19CTFL1	0.00196001	0	0.0095527	0.0590437	0	0
CTFL	Algivore	19CTFL7	0.000370571	0	0.000473456	0.0888823	0	0
CTST	Algivore	19CTST6	0.00991912	0	0.00267629	0.0656713	0.00215067	0
CTST	Algivore	19CTST4	0.00665673	0	0.00302189	0.0688617	0.00459546	0
CTST	Algivore	19CTST3	0.00760011	0	0.00398677	0.0632326	0.00721515	0
CTST	Algivore	19CTST5	0.0260433	0	0.00996178	0.0164275	0.00435562	0
CTST	Algivore	19CTST1	0.00480603	0	0.002504	0.0755327	0	0
Sediment	Environmental	FORSED3	0.00786838	0	0.0211829	0.014485	0	0
Sediment	Environmental	FORSED2	0.0012729	0	0.0296087	0	0	0
Sediment	Environmental	FORSED6	0.0203363	0	0.0192105	0	0	0
Sediment	Environmental	FORSED4	0.00403947	0	0.021392	0.012216	0.0173953	0
Sediment	Environmental	BAKSED4	0.000394592	0	0.00263924	0.0823457	0	0
Sediment	Environmental	BAKSED1	0.00346623	0	0.0259379	0.00742328	0	0
Sediment	Environmental	BAKSED5	0.0139252	0	0.0158853	0	0.0450262	0
Sediment	Environmental	FORSED1	0.00786227	0.210384	0.0176059	0.00610004	0	0
Sediment	Environmental	BAKSED2	0.010184	0	0.0194819	0.00548023	0.0227004	0
Water	Environmental	FORH2O2	0	0	0.0275129	0.0083705	0	0
Water	Environmental	BAKH2O5	0	0	0.030303	0	0	0
Water	Environmental	FORH2O5	0.00450481	0	0.0224451	0.0162024	0	0
CHCI	Facultative corallivore	19CHCI4	0.000313387	0	0.0292991	0.00249907	0	0
CHCI	Facultative corallivore	19CHCI2	0.0145219	0	0.022382	0	0	0
CHCI	Facultative corallivore	19CHCI3	0	0	0.0277764	0.00757992	0	0
CHPE	Facultative corallivore	19CHPE6	0.00120596	0	0.0183128	0.0339974	0	0
CHPE	Facultative corallivore	19CHPE5	0	0	0.0261488	0.0124626	0	0
CHPE	Facultative corallivore	19CHPE4	0	0	0.0211588	0.0274328	0	0
CHPE	Facultative corallivore	19CHPE1	0	0	0.0190442	0.0337765	0	0
CHPE	Facultative corallivore	19CHPE3	0	0	0.0280224	0.00684185	0	0
CHPE	Facultative corallivore	19CHPE8	0	0	0.0281447	0.00647486	0	0
CHSP	Facultative corallivore	19CHSP4	0	0	0.0148176	0.0464562	0	0
CHSP	Facultative corallivore	19CHSP2	0.000294588	0	0.00189212	0.0847507	0	0
CHSP	Facultative corallivore	19CHSP7	0	0	0.0126458	0.0529718	0	0
AMSC	Obligate corallivore	19AMSC7	0	0	0.017368	0.0388052	0	0
AMSC	Obligate corallivore	19AMSC4	0.00231657	0	0.020142	0.0266923	0	0
AMSC	Obligate corallivore	19AMSC6	0	0	0.0295422	0.00228245	0	0
CHLU	Obligate corallivore	19CHLU6	0	0	0.030303	0	0	0
CHLU	Obligate corallivore	19CHLU2	0	0	0.0277836	0.00755831	0	0
CHOR	Obligate corallivore	19CHOR14	0	0	0.0299591	0.0010317	0	0
CHOR	Obligate corallivore	19CHOR8	0	0	0.0295968	0.00211854	0	0
CHOR	Obligate corallivore	19CHOR5	0	0	0.0299329	0.00111037	0	0
CHOR	Obligate corallivore	19CHOR12	0.000756302	0	0.0294047	0.00145746	0	0
CHOR	Obligate corallivore	19CHOR7	0	0	0.0291949	0.0033245	0	0
CHRE	Obligate corallivore	19CHRE11	0.000501118	0	0.0291583	0.00261422	0	0
CHRE	Obligate corallivore	19CHRE9	0	0	0.030303	0	0	0
Pocillopora	Pocillopora	CT111	0	0	0.0272061	0.00929088	0	0
Pocillopora	Pocillopora	CT114	0	0	0.030303	0	0	0
Pocillopora	Pocillopora	CT149	0	0	0.0283296	0.00592037	0	0
Pocillopora	Pocillopora	CT153-1	0	0	0.0243142	0.0179664	0	0
Pocillopora	Pocillopora	CT153-2	0	0	0.028958	0.00403508	0	0
Pocillopora	Pocillopora	Ct17	0	0	0.0216359	0.0260014	0	0
Pocillopora	Pocillopora	CT33	0	0	0.0267622	0.0106225	0	0
Pocillopora	Pocillopora	CT49	0	0	0.0255697	0.0141999	0	0
Pocillopora	Pocillopora	CT60	0	0	0.0225137	0.0233679	0	0
Pocillopora	Pocillopora	CT65	0	0	0.0299488	0.00106262	0	0
Pocillopora	Pocillopora	CT67	0	0	0.0285633	0.00521906	0	0
Pocillopora	Pocillopora	CT84	0	0	0.0296848	0.00185472	0	0
Porites	Porites	CT136	0	0	0.030303	0	0	0
Porites	Porites	CT139	0	0	0.030303	0	0	0
Porites	Porites	CT146	0	0	0.0297748	0.00158474	0	0
Porites	Porites	CT155	0	0	0.0293219	0.0029433	0	0
Porites	Porites	CT22	0	0	0.026877	0.0102781	0	0
Porites	Porites	CT25	0	0	0.029849	0.00136212	0	0
Porites	Porites	CT3	0	0	0.030303	0	0	0
Porites	Porites	CT4	0	0	0.030303	0	0	0
Porites	Porites	CT68	0	0	0.030303	0	0	0
Porites	Porites	CT72	0	0	0.0297323	0.00171221	0	0
Porites	Porites	CT87	0	0	0.030303	0	0	0
Porites	Porites	CT95	0	0	0.030303	0	0	0

## Sheet: ITS2 sample map
Sample	Zone	Type	Species	Species_full	Ecology	Ecology_corsp
19CHOR1	Fore reef	Feces	CHOR	Chaetodon ornatissimus	Obligate corallivore	Obligate corallivore
19CHOR2	Fore reef	Feces	CHOR	Chaetodon ornatissimus	Obligate corallivore	Obligate corallivore
19CHOR3	Fore reef	Feces	CHOR	Chaetodon ornatissimus	Obligate corallivore	Obligate corallivore
19CHOR4	Fore reef	Feces	CHOR	Chaetodon ornatissimus	Obligate corallivore	Obligate corallivore
19CHOR5	Fore reef	Feces	CHOR	Chaetodon ornatissimus	Obligate corallivore	Obligate corallivore
19CHOR6	Fore reef	Feces	CHOR	Chaetodon ornatissimus	Obligate corallivore	Obligate corallivore
19CHOR7	Fore reef	Feces	CHOR	Chaetodon ornatissimus	Obligate corallivore	Obligate corallivore
19CHOR8	Fore reef	Feces	CHOR	Chaetodon ornatissimus	Obligate corallivore	Obligate corallivore
19CHOR9	Back reef	Feces	CHOR	Chaetodon ornatissimus	Obligate corallivore	Obligate corallivore
19CHOR10	Back reef	Feces	CHOR	Chaetodon ornatissimus	Obligate corallivore	Obligate corallivore
19CHOR11	Back reef	Feces	CHOR	Chaetodon ornatissimus	Obligate corallivore	Obligate corallivore
19CHOR12	Back reef	Feces	CHOR	Chaetodon ornatissimus	Obligate corallivore	Obligate corallivore
19CHOR13	Back reef	Feces	CHOR	Chaetodon ornatissimus	Obligate corallivore	Obligate corallivore
19CHOR14	Back reef	Feces	CHOR	Chaetodon ornatissimus	Obligate corallivore	Obligate corallivore
19CTFL1	Fore reef	Feces	CTFL	Ctenochaetus flavicauda	Algivore	Algivore
19CTFL2	Fore reef	Feces	CTFL	Ctenochaetus flavicauda	Algivore	Algivore
19CTFL3	Fore reef	Feces	CTFL	Ctenochaetus flavicauda	Algivore	Algivore
19CTFL4	Fore reef	Feces	CTFL	Ctenochaetus flavicauda	Algivore	Algivore
19CTFL5	Fore reef	Feces	CTFL	Ctenochaetus flavicauda	Algivore	Algivore
19CTFL6	Fore reef	Feces	CTFL	Ctenochaetus flavicauda	Algivore	Algivore
19CTFL7	Fore reef	Feces	CTFL	Ctenochaetus flavicauda	Algivore	Algivore
19CTFL8	Fore reef	Feces	CTFL	Ctenochaetus flavicauda	Algivore	Algivore
19CHSP1	Fore reef	Feces	CHSP	Chlorurus spilurus	Facultative corallivore	Facultative corallivore
19CHSP2	Fore reef	Feces	CHSP	Chlorurus spilurus	Facultative corallivore	Facultative corallivore
19CHSP3	Fore reef	Feces	CHSP	Chlorurus spilurus	Facultative corallivore	Facultative corallivore
19CHSP4	Fore reef	Feces	CHSP	Chlorurus spilurus	Facultative corallivore	Facultative corallivore
19CHSP5	Fore reef	Feces	CHSP	Chlorurus spilurus	Facultative corallivore	Facultative corallivore
19CHSP6	Fore reef	Feces	CHSP	Chlorurus spilurus	Facultative corallivore	Facultative corallivore
19CHSP7	Fore reef	Feces	CHSP	Chlorurus spilurus	Facultative corallivore	Facultative corallivore
19CHSP8	Fore reef	Feces	CHSP	Chlorurus spilurus	Facultative corallivore	Facultative corallivore
19CHCI1	Back reef	Feces	CHCI	Chaetodon citrinellus	Facultative corallivore	Facultative corallivore
19CHCI2	Back reef	Feces	CHCI	Chaetodon citrinellus	Facultative corallivore	Facultative corallivore
19CHCI3	Back reef	Feces	CHCI	Chaetodon citrinellus	Facultative corallivore	Facultative corallivore
19CHCI4	Back reef	Feces	CHCI	Chaetodon citrinellus	Facultative corallivore	Facultative corallivore
19CHCI5	Back reef	Feces	CHCI	Chaetodon citrinellus	Facultative corallivore	Facultative corallivore
19CHCI6	Back reef	Feces	CHCI	Chaetodon citrinellus	Facultative corallivore	Facultative corallivore
19CHLU1	Fore reef	Feces	CHLU	Chaetodon lunulatus	Obligate corallivore	Obligate corallivore
19CHLU2	Back reef	Feces	CHLU	Chaetodon lunulatus	Obligate corallivore	Obligate corallivore
19CHLU3	Back reef	Feces	CHLU	Chaetodon lunulatus	Obligate corallivore	Obligate corallivore
19CHLU4	Back reef	Feces	CHLU	Chaetodon lunulatus	Obligate corallivore	Obligate corallivore
19CHLU5	Back reef	Feces	CHLU	Chaetodon lunulatus	Obligate corallivore	Obligate corallivore
19CHLU6	Back reef	Feces	CHLU	Chaetodon lunulatus	Obligate corallivore	Obligate corallivore
19CHLU7	Back reef	Feces	CHLU	Chaetodon lunulatus	Obligate corallivore	Obligate corallivore
19CHLU8	Back reef	Feces	CHLU	Chaetodon lunulatus	Obligate corallivore	Obligate corallivore
19CTST1	Back reef	Feces	CTST	Ctenochaetus striatus	Algivore	Algivore
19CTST2	Back reef	Feces	CTST	Ctenochaetus striatus	Algivore	Algivore
19CTST3	Back reef	Feces	CTST	Ctenochaetus striatus	Algivore	Algivore
19CTST4	Back reef	Feces	CTST	Ctenochaetus striatus	Algivore	Algivore
19CTST5	Back reef	Feces	CTST	Ctenochaetus striatus	Algivore	Algivore
19CTST6	Back reef	Feces	CTST	Ctenochaetus striatus	Algivore	Algivore
19CHPE1	Fore reef	Feces	CHPE	Chaetodon pelewensis	Facultative corallivore	Facultative corallivore
19CHPE2	Fore reef	Feces	CHPE	Chaetodon pelewensis	Facultative corallivore	Facultative corallivore
19CHPE3	Fore reef	Feces	CHPE	Chaetodon pelewensis	Facultative corallivore	Facultative corallivore
19CHPE4	Fore reef	Feces	CHPE	Chaetodon pelewensis	Facultative corallivore	Facultative corallivore
19CHPE5	Fore reef	Feces	CHPE	Chaetodon pelewensis	Facultative corallivore	Facultative corallivore
19CHPE6	Fore reef	Feces	CHPE	Chaetodon pelewensis	Facultative corallivore	Facultative corallivore
19CHPE7	Fore reef	Feces	CHPE	Chaetodon pelewensis	Facultative corallivore	Facultative corallivore
19CHPE8	Fore reef	Feces	CHPE	Chaetodon pelewensis	Facultative corallivore	Facultative corallivore
19AMSC1	Fore reef	Feces	AMSC	Amanses scopas	Obligate corallivore	Obligate corallivore
19AMSC2	Fore reef	Feces	AMSC	Amanses scopas	Obligate corallivore	Obligate corallivore
19AMSC3	Fore reef	Feces	AMSC	Amanses scopas	Obligate corallivore	Obligate corallivore
19AMSC4	Fore reef	Feces	AMSC	Amanses scopas	Obligate corallivore	Obligate corallivore
19AMSC5	Fore reef	Feces	AMSC	Amanses scopas	Obligate corallivore	Obligate corallivore
19AMSC6	Fore reef	Feces	AMSC	Amanses scopas	Obligate corallivore	Obligate corallivore
19AMSC7	Fore reef	Feces	AMSC	Amanses scopas	Obligate corallivore	Obligate corallivore
19CHRE1	Fore reef	Feces	CHRE	Chaetodon reticulatus	Obligate corallivore	Obligate corallivore
19CHRE2	Fore reef	Feces	CHRE	Chaetodon reticulatus	Obligate corallivore	Obligate corallivore
19CHRE3	Fore reef	Feces	CHRE	Chaetodon reticulatus	Obligate corallivore	Obligate corallivore
19CHRE4	Fore reef	Feces	CHRE	Chaetodon reticulatus	Obligate corallivore	Obligate corallivore
19CHRE5	Fore reef	Feces	CHRE	Chaetodon reticulatus	Obligate corallivore	Obligate corallivore
19CHRE6	Fore reef	Feces	CHRE	Chaetodon reticulatus	Obligate corallivore	Obligate corallivore
19CHRE7	Fore reef	Feces	CHRE	Chaetodon reticulatus	Obligate corallivore	Obligate corallivore
19CHRE8	Fore reef	Feces	CHRE	Chaetodon reticulatus	Obligate corallivore	Obligate corallivore
19CHRE9	Back reef	Feces	CHRE	Chaetodon reticulatus	Obligate corallivore	Obligate corallivore
19CHRE10	Back reef	Feces	CHRE	Chaetodon reticulatus	Obligate corallivore	Obligate corallivore
19CHRE11	Back reef	Feces	CHRE	Chaetodon reticulatus	Obligate corallivore	Obligate corallivore
CT3	Fore reef	Coral	Porites	Porites	Coral	Porites
CT4	Fore reef	Coral	Porites	Porites	Coral	Porites
CT153-1	Fore reef	Coral	Pocillopora	Pocillopora	Coral	Pocillopora
Ct17	Fore reef	Coral	Pocillopora	Pocillopora	Coral	Pocillopora
CT21	Fore reef	Coral	Acropora	Acropora	Coral	Acropora
CT22	Fore reef	Coral	Porites	Porites	Coral	Porites
CT25	Fore reef	Coral	Porites	Porites	Coral	Porites
CT26	Fore reef	Coral	Acropora	Acropora	Coral	Acropora
CT27	Fore reef	Coral	Acropora	Acropora	Coral	Acropora
CT33	Fore reef	Coral	Pocillopora	Pocillopora	Coral	Pocillopora
CT49	Fore reef	Coral	Pocillopora	Pocillopora	Coral	Pocillopora
CT53	Back reef	Coral	Acropora	Acropora	Coral	Acropora
CT60	Back reef	Coral	Pocillopora	Pocillopora	Coral	Pocillopora
CT64	Back reef	Coral	Acropora	Acropora	Coral	Acropora
CT65	Back reef	Coral	Pocillopora	Pocillopora	Coral	Pocillopora
CT67	Back reef	Coral	Pocillopora	Pocillopora	Coral	Pocillopora
CT68	Back reef	Coral	Porites	Porites	Coral	Porites
CT72	Back reef	Coral	Porites	Porites	Coral	Porites
CT73	Back reef	Coral	Acropora	Acropora	Coral	Acropora
CT84	Back reef	Coral	Pocillopora	Pocillopora	Coral	Pocillopora
CT87	Back reef	Coral	Porites	Porites	Coral	Porites
CT94	Back reef	Coral	Acropora	Acropora	Coral	Acropora
CT95	Back reef	Coral	Porites	Porites	Coral	Porites
CT102	Fore reef	Coral	Acropora	Acropora	Coral	Acropora
CT108	Back reef	Coral	Acropora	Acropora	Coral	Acropora
CT111	Back reef	Coral	Pocillopora	Pocillopora	Coral	Pocillopora
CT114	Back reef	Coral	Pocillopora	Pocillopora	Coral	Pocillopora
CT117	Back reef	Coral	Acropora	Acropora	Coral	Acropora
CT136	Back reef	Coral	Porites	Porites	Coral	Porites
CT139	Back reef	Coral	Porites	Porites	Coral	Porites
CT145	Fore reef	Coral	Acropora	Acropora	Coral	Acropora
CT146	Fore reef	Coral	Porites	Porites	Coral	Porites
CT149	Fore reef	Coral	Pocillopora	Pocillopora	Coral	Pocillopora
CT153-2	Fore reef	Coral	Pocillopora	Pocillopora	Coral	Pocillopora
CT155	Fore reef	Coral	Porites	Porites	Coral	Porites
CT159	Fore reef	Coral	Acropora	Acropora	Coral	Acropora
BAKSED1	Back reef	Sediment	Sediment	Sediment	Environmental	Environmental
BAKSED2	Back reef	Sediment	Sediment	Sediment	Environmental	Environmental
BAKSED3	Back reef	Sediment	Sediment	Sediment	Environmental	Environmental
BAKSED4	Back reef	Sediment	Sediment	Sediment	Environmental	Environmental
BAKSED5	Back reef	Sediment	Sediment	Sediment	Environmental	Environmental
BAKSED6	Back reef	Sediment	Sediment	Sediment	Environmental	Environmental
FORSED1	Fore reef	Sediment	Sediment	Sediment	Environmental	Environmental
FORSED2	Fore reef	Sediment	Sediment	Sediment	Environmental	Environmental
FORSED3	Fore reef	Sediment	Sediment	Sediment	Environmental	Environmental
FORSED4	Fore reef	Sediment	Sediment	Sediment	Environmental	Environmental
FORSED5	Fore reef	Sediment	Sediment	Sediment	Environmental	Environmental
FORSED6	Fore reef	Sediment	Sediment	Sediment	Environmental	Environmental
BAKH2O1	Back reef	Water	Water	Water	Environmental	Environmental
BAKH2O2	Back reef	Water	Water	Water	Environmental	Environmental
BAKH2O3	Back reef	Water	Water	Water	Environmental	Environmental
BAKH2O4	Back reef	Water	Water	Water	Environmental	Environmental
BAKH2O5	Back reef	Water	Water	Water	Environmental	Environmental
BAKH2O6	Back reef	Water	Water	Water	Environmental	Environmental
FORH2O1	Fore reef	Water	Water	Water	Environmental	Environmental
FORH2O2	Fore reef	Water	Water	Water	Environmental	Environmental
FORH2O3	Fore reef	Water	Water	Water	Environmental	Environmental
FORH2O4	Fore reef	Water	Water	Water	Environmental	Environmental
FORH2O5	Fore reef	Water	Water	Water	Environmental	Environmental
FORH2O6	Fore reef	Water	Water	Water	Environmental	Environmental

## Sheet: ITS2 species codes
Species_full	Specode
Acropora	Acropora
Amanses scopas	AMSC
Chaetodon citrinellus	CHCI
Chaetodon lunulatus	CHLU
Chaetodon ornatissimus	CHOR
Chaetodon pelewensis	CHPE
Chaetodon reticulatus	CHRE
Chlorurus spilurus	CHSP
Ctenochaetus flavicauda	CTFL
Ctenochaetus striatus	CTST
Pocillopora	Pocillopora
Porites	Porites
Sediment	Sediment
Water	Water

## Sheet: ITS2 Symbiont genera
clade	genus
A	Symbiodinium
B	Breviolum
C	Cladocopium
D	Durusdinium
F	Fugacium

## Sheet: Bootstrap_datafile_metadata
Variable	Explanation	Variable type	Levels	Year	Source
Reef_zone	Area on the reef where data were collected	Categorical	"Back Reef", "Fore Reef"		NA
Species_code	Abbreviation of species name	Categorical	"CHOR", "CHRE", "CHCI"		NA
Species_full	Full species name	Categorical	"Chaetodon ornatissimus", "Chaetodon reticulatus", "Chaetodon citrinellus"		NA
Live_g_sample	Number of live Symbiodiniaceae cells per gram feces	Continuous		2019	This study
Wet_weight_g_cm	Wet weight (g) of feces per cm of feces length	Continuous		2019	This study
MCR_LTER_Site	MCR LTER site number where fish density data were collected	Categorical	"1", "2"		MCR LTER time series data: http://mcrlter.msi.ucsb.edu/cgi-bin/showDataset.cgi?docid=knb-lter-mcr.6 accessed February 14, 2020
Transect_number	Transect number at each MCR LTER site where fish density data were collected	Categorical	"1", "2", "3", "4"		MCR LTER time series data: http://mcrlter.msi.ucsb.edu/cgi-bin/showDataset.cgi?docid=knb-lter-mcr.6 accessed February 14, 2020
Fish_density	The density of fish on a 5 by 50 m transects	Continuous		2018	MCR LTER time series data: http://mcrlter.msi.ucsb.edu/cgi-bin/showDataset.cgi?docid=knb-lter-mcr.6 accessed February 14, 2020
Pellet_length	The measured length of a fecal pellet (cm)	Continuous		2019	This study
The code needed to run this analysis can be found on https://github.com/CorreaLab/Fishces_2020/blob/master/Symbiodiniaceae%20cell%20dispersal%20bootstrap%20code.

[truncated: 1 more sheets: Bootstrap_datafile]
